# Supplementary material for: Detection of Antibiotic Resistance in Feline-Origin ESBL Escherichia coli from Different Areas of China and the Resistance Elimination of Garlic Oil to Cefquinome on ESBL E. coli
Source: MDPI journal article supplement (doi:10.3390/ijms24119627), 2023-06-01
Supplement: s1 [file s1]

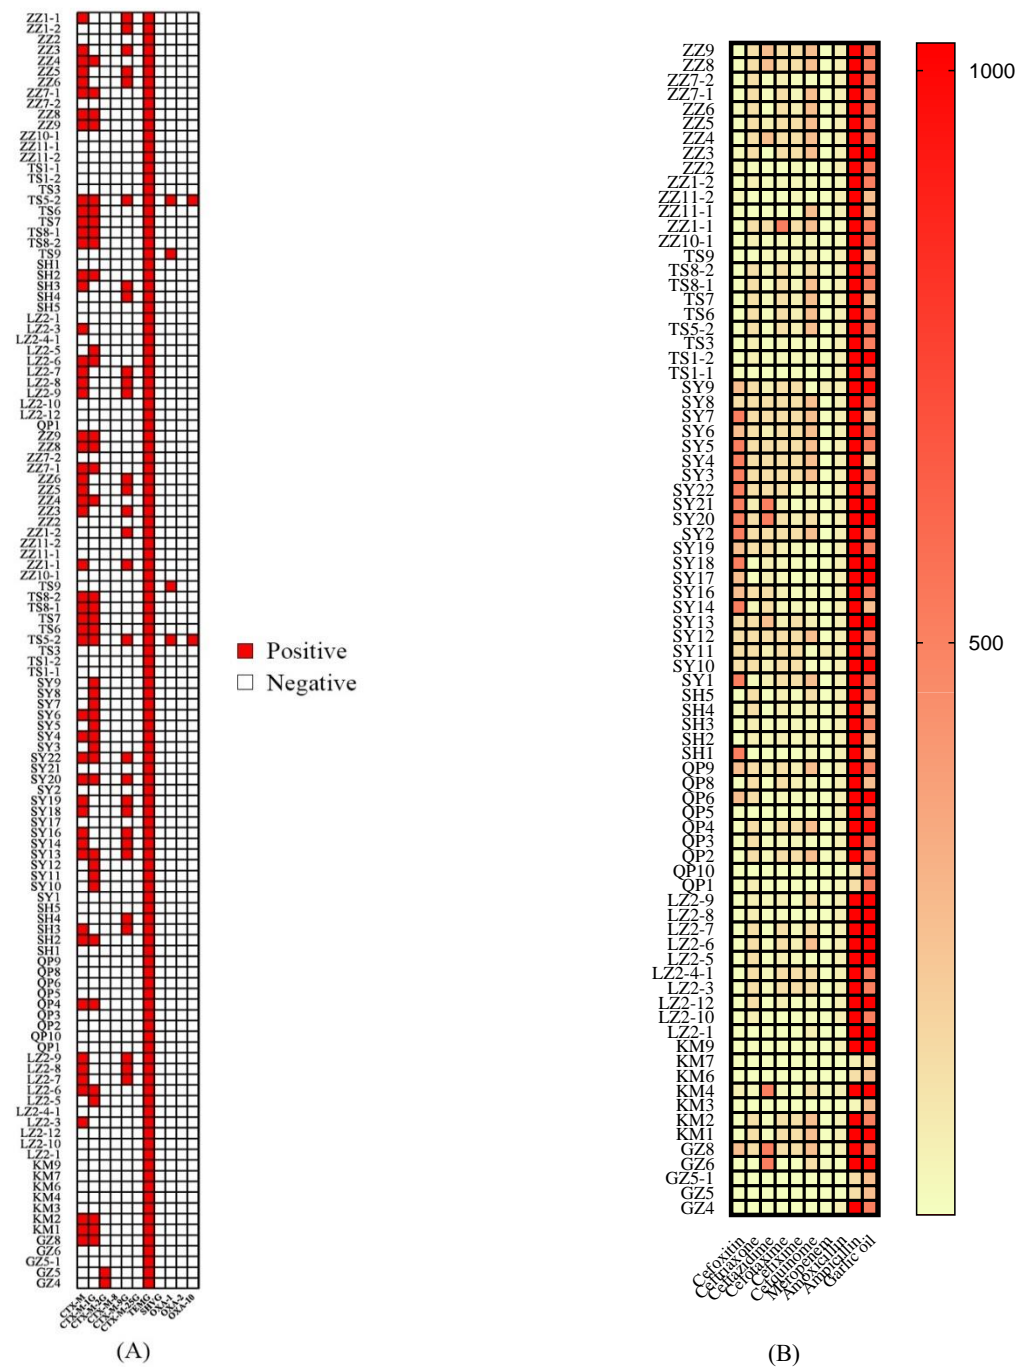

**Figure S1. (A)** Detection of ESBLS genes carried by 80 *E. coli* strains identified. **(B)** MICs of 80 identified *E. coli* strains for 9 antibiotics and garlic oil.
